# Supplementary material for: Unveiling the Impacts of Sodium Hypochlorite on the Characteristics and Fouling Behaviors of Different Commercial Polyvinylidene Fluoride Hollow Fiber Membranes
Source: MDPI journal article supplement (doi:10.3390/membranes12100965), 2022-10-01
Supplement: s1 [file s1]

# Unveiling the Impacts of Sodium Hypochlorite on the Characteristics and Fouling Behaviors of Different Commercial Polyvinylidene Fluoride Hollow Fiber Membranes

Muqiao Han <sup>1,2</sup>, Qi Han <sup>3</sup>, Shanwei Wu <sup>3</sup>, Hu Xiao <sup>3</sup>, Lei Zhang <sup>3</sup>, Yibo Lin <sup>1,2</sup>, Fangang Meng <sup>1,2</sup> and Shanshan Zhao <sup>1,2,\*</sup>

<sup>1</sup> School of Environmental Science and Engineering, Sun Yat-sen University, Guangzhou 510006, China

<sup>2</sup> Guangdong Provincial Key Laboratory of Environmental Pollution Control and Remediation Technology, Guangzhou 510006, China

<sup>3</sup> Guangzhou Jinrongtao Environmental Protection Technology Co., Ltd., Guangzhou, 511400, China

\* Correspondence: zhaoshsh7@mail.sysu.edu.cn

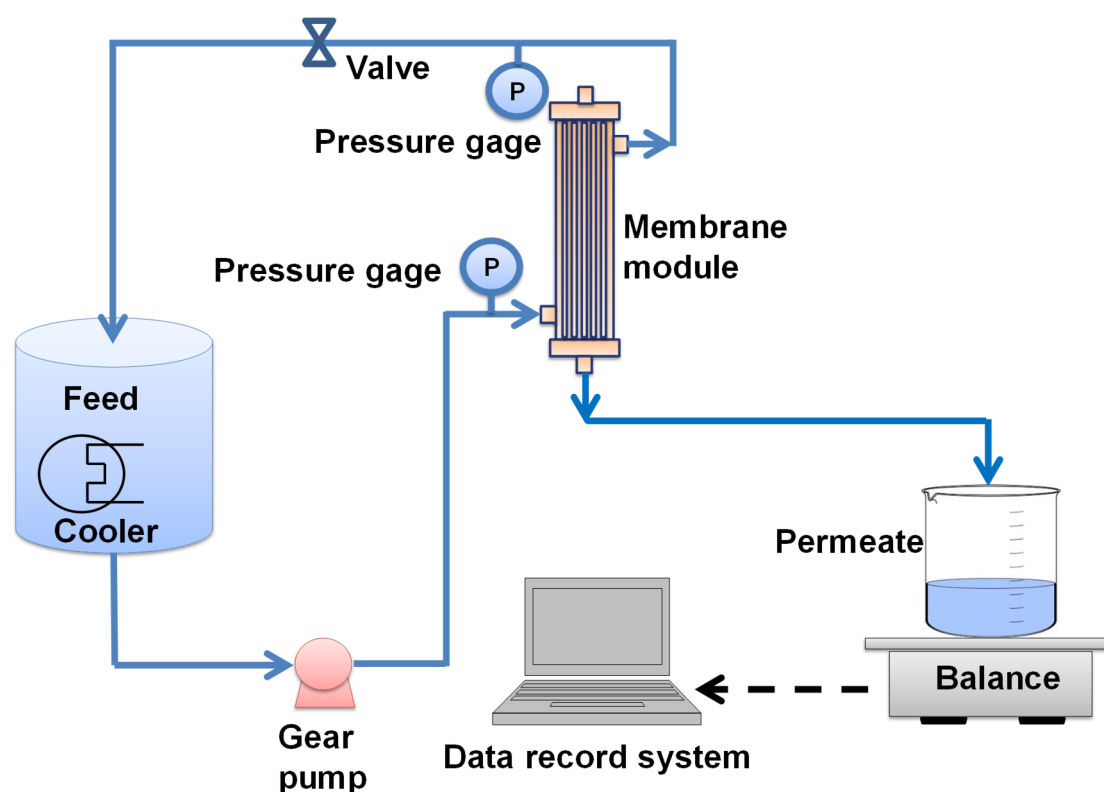

**Figure S1.** Schematic illustration of the bench-scale cross-flow filtration system.

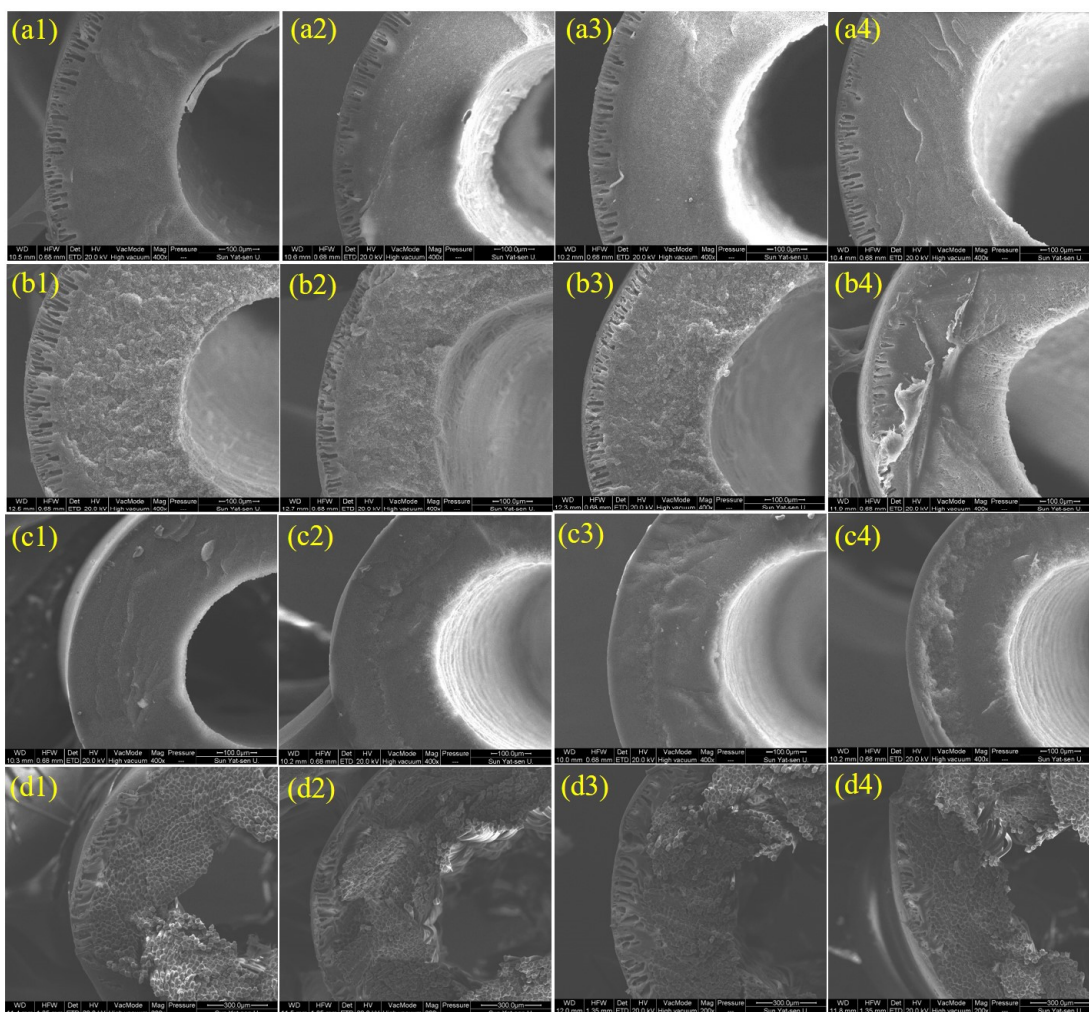

**Figure S2.** FESEM images of the cross-section morphologies of pristine and NaOCl-exposed membranes. (a) A membrane, NaOCl pH=10; (b) B membrane, NaOCl pH=10; (c) C membrane, NaOCl pH=10; and (d) A membrane, NaOCl pH=8; 1, 2, 3, and 4 represent exposure time 0, 48, 192, and 500 h, respectively.
